# Supplementary material for: Dietary Patterns Associated with Cognitive Function among the Older People in Underdeveloped Regions: Finding from the NCDFaC Study
Source: MDPI journal article supplement (doi:10.3390/nu10040464), 2018-04-09
Supplement: s1 [file s1]

**Dietary Patterns Associated with Cognitive Function Among the Older People in Underdeveloped Regions: Finding from the NCDFaC Study**

**Supplementary file:**

**Table S1.** Food grouping used in the dietary pattern analysis.

| <b>Food Groups</b>         | <b>Food Items/Subgroups</b>                                                               |
|----------------------------|-------------------------------------------------------------------------------------------|
| cereal grains              | rice product, wheat products, coarse cereals (millets, sorghum, maize, etc.)              |
| tubers                     | tubers (sweet potatoes, Chinese yam, taro, potatoes, etc.)                                |
| fried foods                | fried foods (deep-fried dough stick, fried dough cake, etc.)                              |
| red meat                   | pork, beef, and mutton                                                                    |
| poultry                    | poultry                                                                                   |
| organ meat                 | organ meat                                                                                |
| aquatic products           | aquatic products                                                                          |
| whole milk                 | whole milk                                                                                |
| dairy products             | milk powder, cheese, yogurt,                                                              |
| eggs                       | eggs                                                                                      |
| soybean products           | tofu, bean curd/bean curd cake                                                            |
| soybean milk               | soybean milk                                                                              |
| dried legume               | dried legume                                                                              |
| vegetables                 | fresh vegetables, dried vegetables                                                        |
| pickles                    | salted vegetables, kraut, sauerkraut                                                      |
| fresh mushrooms            | fresh mushrooms                                                                           |
| dried mushrooms            | dried mushrooms, other dried fungus (Chinese black fungus, tremella, bamboo fungus, etc.) |
| dessert                    | dessert                                                                                   |
| fresh fruits               | fresh fruits                                                                              |
| nuts                       | nuts                                                                                      |
| alcoholic beverages        | low-alcohol liquor, strong liquor, beer, fruit wine                                       |
| fruit and vegetables juice | fresh fruit and vegetable juice, packaged fruit and vegetables juice                      |
| beverages                  | sugar-contained beverages, less sugary drinks, coffee                                     |
| tea                        | tea                                                                                       |
